# Supplementary material
Source: HighWire-hosted journal article supplement (http://www.cmaj.ca/highwire/filestream/58719/field_highwire_adjunct_files/5/insulin-yu-6-at.pdf)
Supplement: insulin-yu-6-at.pdf [file insulin-yu-6-at.pdf]

## Appendix 6 (as supplied by the authors): Insulin types and pharmacokinetics\*

| <i>Insulin type (trade name)</i>                                                                                                                                                                  | <i>Onset</i>                                                                                                                                 | <i>Peak</i>                 | <i>Duration</i>                             |
|---------------------------------------------------------------------------------------------------------------------------------------------------------------------------------------------------|----------------------------------------------------------------------------------------------------------------------------------------------|-----------------------------|---------------------------------------------|
| <b>Prandial (bolus) insulins</b>                                                                                                                                                                  |                                                                                                                                              |                             |                                             |
| Rapid-acting insulin analogues (clear) <ul style="list-style-type: none"> <li>• Insulin aspart (NovoRapid)</li> <li>• Insulin lispro (Humalog)</li> <li>• Insulin glulisine (Apidra)</li> </ul>   | 10–15 min<br>10–15 min<br>10–15 min                                                                                                          | 1–1.5 h<br>1–2 h<br>1–1.5 h | 3–5 h<br>3.5–4.75 h<br>3–5 h                |
| Short-acting insulins (clear) <ul style="list-style-type: none"> <li>• Humulin-R</li> <li>• Novolin ge Toronto</li> </ul>                                                                         | 30 min                                                                                                                                       | 2–3 h                       | 6.5 h                                       |
| <b>Basal insulins</b>                                                                                                                                                                             |                                                                                                                                              |                             |                                             |
| Intermediate-acting (cloudy) <ul style="list-style-type: none"> <li>• Humulin-N</li> <li>• Novolin ge NPH</li> </ul>                                                                              | 1–3 h                                                                                                                                        | 5–8 h                       | Up to 18 h                                  |
| Long-acting basal insulin analogues (clear) <ul style="list-style-type: none"> <li>• Insulin detemir (Levemir)</li> <li>• Insulin glargine (Lantus)</li> </ul>                                    | 90 min                                                                                                                                       | Not applicable              | Up to 24 h (glargine 24 h, detemir 16–24 h) |
| <b>Premixed insulins</b>                                                                                                                                                                          |                                                                                                                                              |                             |                                             |
| Premixed regular insulin – NPH (cloudy) <ul style="list-style-type: none"> <li>• Humulin 30/70</li> <li>• Novolin ge 30/70, 40/60, 50/50</li> </ul>                                               | A single vial or cartridge contains a fixed ratio of insulin (% of rapid-acting or short-acting insulin to % of intermediate-acting insulin) |                             |                                             |
| Premixed insulin analogues (cloudy) <ul style="list-style-type: none"> <li>• Biphasic insulin aspart (NovoMix 30)</li> <li>• Insulin lispro/lispro protamine (Humalog Mix25 and Mix50)</li> </ul> |                                                                                                                                              |                             |                                             |

\*Adapted, with permission, from the Canadian Diabetes Association, Clinical Practice Guidelines Expert Committee. Canadian Diabetes Association 2008 clinical practice guidelines for the prevention and management of diabetes in Canada. *Can J Diabetes* 2008;32(Suppl 1):S1-S201.
